# Supplementary material for: RETRACTED: Differential Regulation of the EGFR/PI3K/AKT/PTEN Pathway between Low- and High-Grade Gliomas
Source: MDPI journal article supplement (doi:10.3390/brainsci11121655), 2021-12-18
Supplement: s1 [file s1]

**Supplement Table S2.** Sequence of primers used in qRT-PCR.

| <b>GENE</b> | <b>SENSE</b>               | <b>ANTISENSE</b>             |
|-------------|----------------------------|------------------------------|
| AKT         | 5'GCTGGACGATAGCTTGGA3'     | 5'GAGAGATGACAGATAGCTGGTGAC3' |
| Bcl-2       | 5'AAGATTGATGGGATCGTTGC 3'  | 5'GCGGAACACTTGATTCTGGT 3'    |
| Bax         | 5'TTTGCTTCAGGGTTTCATCC 3'  | 5'CAGTTGAAGTTGCCGTCAGA 3'    |
| PI3K        | 5'ACCCCAAGTTTTTGTTGCTTG 3' | 5'ACTGCCCAACAAAACAGTCC 3'    |
| Actina      | 5'ATTGCCGACAGGATGCAGA 3'   | 5' GAGTACTTGCGCTCAGGAGGA 3'  |
