# Supplementary material for: RETRACTED: Differential Regulation of the EGFR/PI3K/AKT/PTEN Pathway between Low- and High-Grade Gliomas
Source: MDPI journal article supplement (doi:10.3390/brainsci11121655), 2021-12-18
Supplement: s1 [file s1]

**Supplement Table S1.** Sequences of probes and primers for gene amplification.

| GEN       |                                         | Product   |                 |
|-----------|-----------------------------------------|-----------|-----------------|
|           |                                         | size (pb) | T°-melting (°C) |
| EGFR      |                                         |           |                 |
| SENSE     | 5'GACCTGGGAGCTGGGAGAAC 3'               | 97        | 79,6            |
| ANTISENSE | 5' ACCTGCCTTTTGCCAACGAG 3'              |           |                 |
| PROBE     | 5' TAMRA-AACTAACCGCCGCCAGCACCACC-FAM 3' |           |                 |
| AKT       |                                         |           |                 |
| SENSE     | 5' AGACCTGGGCTGGTGATGTG 3'              | 121       | 79,1            |
| ANTISENSE | 5' CAGACTGTGGGACCTTTCTCTC 3'            |           |                 |
| PROBE     | 5'ROX-ACCACGAGCCACGGAAGCCAGTCA-TAMRA 3' |           |                 |
| PI3K      |                                         |           |                 |
| SENSE     | 5' AGCAGACCCAGTACCTGTCC 3'              | 141       | 79,3            |
| ANTISENSE | 5' AGGGTTGGTCCTTCTATGAGAAT 3'           |           |                 |
| PROBE     | 5'HEX-AGTGCCGCTGCTGCTCCGACAAC-TAMRA 3'  |           |                 |
| ACTINA    |                                         |           |                 |
| SENSE     | 5' CCGTCTTCCCCTCCATCGTG 3'              | 111       | 84,1            |
| ANTISENSE | 5' GGCTCCTGTGCAGAGAAAGC 3'              |           |                 |
| PROBE     | 5'FAM- TTGCCTCCCGCCCGCTCCCG-TAMRA3'     |           |                 |
